1  
2 Accuracy of Samsung Smartphone Integrated Pulse Oximetry Meets Full  
3 FDA Clearance Standards for Clinical Use.

4 Sara H. Browne<sup>1,4</sup> \*†, Mike Bernstein<sup>2\*</sup>, Philip E. Bickler<sup>3</sup>

5  
6 Division of Infectious Diseases and Global Public Health, University of California San Diego, La  
7 Jolla, CA, USA<sup>1</sup>, Physio Monitor, LLC, San Ramon, CA, USA<sup>2</sup>, Department of Anesthesia,  
8 University of California San Francisco, San Francisco, CA, USA. <sup>3</sup>Specialists in Global Health,  
9 Encinitas, CA, USA,<sup>4</sup>

10  
11 \* These Authors contributed equally to this work

12 † Corresponding Author

13  
14 Funding Sources: This research was funded by a NIH grant supplement R01MH110057-04S to  
15 SHB and by the non-profit, Specialists in Global Health (<https://sigh.global/>).

16  
17  
18 **Abstract**  
19 *Background:* Pulse oximetry is used as an assessment tool to gauge the severity of COVID-19  
20 infection and identify patients at risk of poor outcomes. <sup>1,2,3,4</sup> The pandemic highlights the need for  
21 accurate pulse oximetry, particularly at home, as infection rates increase in multiple global regions  
22 including the UK, USA and South Africa <sup>5</sup>. Over 100 million Samsung smartphones containing  
23 dedicated biosensors (Maxim Integrated Inc, San Jose, CA) and preloaded Apps to perform pulse

24 oximetry, are in use globally. We performed detailed in human hypoxia testing on the Samsung S9  
25 smartphone to determine if this integrated hardware meets full FDA/ISO requirements for clinical  
26 pulse oximetry.

27 *Methods:* The accuracy of integrated pulse oximetry in the Samsung 9 smartphone during stable  
28 arterial oxygen saturations (SaO<sub>2</sub>) between 70% and 100% was evaluated in 12 healthy subjects.  
29 Inspired oxygen, nitrogen, and carbon dioxide partial pressures were monitored and adjusted via a  
30 partial rebreathing circuit to achieve stable target SaO<sub>2</sub> plateaus between 70% and 100%. Arterial  
31 blood samples were taken at each plateau and saturation measured on each blood sample using  
32 ABL-90FLEX blood gas analyzer. Bias, calculated from smartphone readings minus the  
33 corresponding arterial blood sample, was reported as root mean square deviation (RMSD).

34 *Findings:* The RMSD of the over 257 data points based on blood sample analysis obtained from 12  
35 human volunteers tested was 2.6%.

36 *Interpretation:* Evaluation of the smartphone pulse oximeter performance is within requirements of  
37 <3.5% RMSD blood oxygen saturation (SpO<sub>2</sub>) value for FDA/ISO clearance for clinical pulse  
38 oximetry. This is the first report of smartphone derived pulse oximetry measurements that meet full  
39 FDA/ISO accuracy certification requirements. Both Samsung S9 and S10 contain the same  
40 integrated pulse oximeter, thus over 100 million smartphones in current global circulation could be  
41 used to obtain clinically accurate spot SpO<sub>2</sub> measurements to support at home assessment of  
42 COVID-19 patients.

43

## 44 **Introduction**

45 Pulse oximetry supports the triage and initial management of symptomatic adults during respiratory  
46 infection pandemics<sup>6,7</sup>. Pulse oximetry is being used during the current pandemic as an assessment

47 tool to identify patients with COVID-19 at risk of poor outcomes <sup>1</sup> and gauge the severity of  
48 infection.<sup>2,3,4</sup> The pandemic has highlighted the need for accurate pulse oximetry, particularly at  
49 home. In conjunction with COVID symptom diaries, at home oximetry is being used to detect early  
50 deterioration of patients in primary and community care settings.<sup>8,9</sup> Primary care assessment  
51 pathways within major healthcare systems have developed guidance directives centered around  
52 SpO<sub>2</sub> measurements taken at home due to isolation; these readings with respiratory rates (RR) and  
53 mental state assessments obtained during virtual visits are being used to generate national early  
54 warning scores (NEWS).<sup>8</sup>

55 Remote healthcare providers also guide patients on early warning signs of worsening COVID-19  
56 infection centered on deteriorating at home SpO<sub>2</sub> measurements over time, as well as exertion  
57 oximetry (exercise induced hypoxia).<sup>8,10,11</sup> The term ‘silent hypoxia’ associated with COVID-19  
58 infection has appeared in the literature to describe the lack of dyspnea in some patients. <sup>10</sup> These  
59 reports serve as a reminder that the diagnosis of hypoxemia, even severe hypoxemia, is sometimes  
60 missed without objective measures such as non-invasive oximetry or arterial blood gases (ABGs).<sup>11</sup>

61 The broad availability of accurate pulse oximetry is evidently of considerable significance during  
62 the current pandemic; furthermore, inequity in the distribution of accurate oximetry devices globally  
63 has been well documented by the WHO<sup>12</sup>. FDA/ISO cleared pulse oximeter devices are expensive  
64 and it is likely that the majority of at home pulse oximeters currently in use, including those  
65 dispensed by large healthcare systems, are inexpensive devices that may be associated with wide  
66 variability in accuracy.<sup>13</sup>

67

68 Samsung Galaxy S9 and 10 smartphones include the same dedicated hardware using high grade  
69 integrated biosensors and preloaded proprietary Samsung Apps that process the sensor data,

70 calculate saturation and heartrate and then display the user's pulse oximetry measurement<sup>14</sup>. In  
71 2018, an estimated 45 million S9 smartphones were shipped worldwide.<sup>15</sup> In addition reports  
72 indicate that 71 million S10 smartphones were shipped by the end of 2019. Given the increased  
73 global demand for accurate pulse oximetry associated with the COVID-19 pandemic, we performed  
74 detailed in human testing to determine if these smartphones meet the FDA/ISO requirements for  
75 clinical pulse oximetry. FDA 510K clearance and ISO CE marking require assessment of accuracy  
76 during hypoxemia. This type of testing was introduced by John Severinghaus MD of the University  
77 of California, San Francisco (UCSF) and refined by Dr. Philip Bicker UCSF<sup>16,17</sup> During this testing  
78 detailed evaluation of bias between smartphone pulse oximeter readings and arterial blood gas  
79 measurements are made.

80

## 81 **Methods**

82 A Samsung S9+ smartphone (Samsung, Seoul, South Korea) containing Maxim Integrated  
83 biosensors, part number MAX86916 (Maxim Integrated, San Jose, CA) associated with the  
84 proprietary Samsung Health App was the test instrument. The test instrument has phone biosensors  
85 include a specialized dedicated photodetector and 2 precision wavelength LEDs equivalent to those  
86 used in clinical oximeters that in this case are dedicated to the oximetry function (See Figure 1).  
87 The associated App processes the sensor data, calculates saturation and heartrate then displays it for  
88 the user view and record if desired.

89

90 Evaluation of test instrument oximeter performance was done using controlled steady-state hypoxia  
91 at the UCSF Hypoxia Research Laboratory. The work was sanctioned by the UCSF Committee on  
92 Human Research, protocol 10-00437, and conformed to all internationally accepted standards for

93 the protection of human subjects. We enrolled 12 participants, 4 male, 8 female, including 3  
94 participants with darkly pigmented skin. All volunteers provided written informed consent. The  
95 left forefinger of each subject was placed over the smartphone sensor system (see Figure 1). During  
96 laboratory testing a series of desaturations are performed over 30 minutes. To enable test  
97 Participant to hold their finger continuously in position over a 30 minute period of time a silicone  
98 boot was used during Laboratory testing. Figure 2 shows the silicone boot attached to a plastic cell  
99 phone case that was utilized in this test.

100  
101 A 22-gauge radial artery cannula was placed in each participant after lidocaine local anesthesia.  
102 The participants then breathed a mixture of air, nitrogen and carbon dioxide to produce stable levels  
103 of arterial saturation between 100% and 70%. When oxygenation was stable, as assessed from end-  
104 tidal gas and reference pulse oximeters, 2 arterial blood samples were taken, 30 seconds apart.  
105 Saturation and other oximetry parameters was measured on each blood sample with an ABL-  
106 90FLEX blood gas analyzer (Radiometer, Brea, CA, USA).  
107 Statistical Analysis: Bias was computed as smartphone readings minus the corresponding arterial  
108 blood sample value. Bias is reported as root mean square deviation (RMSD). A plot was generated  
109 following Bland and Altman with adjustments for multiple measurements for each individual  
110 according to the “Method Where the True Value Varies”<sup>17</sup> The FDA 2013 guidance prescribes the  
111 use of a Bland Altman error plot with specifically calculated limits of agreement.<sup>18</sup>

112

## 113 **Results**

114 In this study no plateaus were rejected for lack of stability between the first blood sample and the  
115 second. Eighteen readings from the device under test were rejected because the results were

116 delayed more than 15 seconds past the sample time. Twelve subjects completed the study and there  
117 were no adverse events.

118  
119 Figure 3 displays a modified Bland-Altman Plot of the entire data set. The RMSD of the over 257  
120 data points based on blood sample analysis obtained from 12 human volunteers tested is 2.6%.

121

## 122 **Discussion:**

123 *Interpretation of findings:* Evaluation of oximeter performance during controlled steady-state  
124 hypoxia using the Samsung S9+ smartphone, containing Maxim Integrated biosensors and Samsung  
125 Health App, revealed that readings had an RSMD of 2.6% from over 257 simultaneous ABGs. This  
126 finding is well within requirements for FDA/ISO clearance for clinical pulse oximetry, which is  
127 <3.5% RMSD SpO<sub>2</sub> value. This is the first report of smartphone derived pulse oximetry  
128 measurements that meets full FDA/ISO accuracy certification requirements. These findings indicate  
129 that an estimated 45 million Samsung S9/9+ smartphones, with existing embedded dedicated  
130 hardware and preloaded Apps, in current circulation may be used to take accurate clinical grade  
131 pulse oximeter readings. Furthermore, S10 series smartphones contain the same biosensor  
132 hardware and preloaded Apps with the same proprietary Samsung algorithm, with reports stating 71  
133 million such smartphones were shipped by the end of 2019.<sup>19</sup> Consequently, the implications of our  
134 study for global access to accurate pulse oximetry during the current COVID-19 pandemic are  
135 considerable.

136 Up to this point studies evaluating smartphone pulse oximetry have shown variable accuracy with  
137 the minority supporting any clinical use. Jordan et al. compared pulse oximetry Apps downloaded  
138 on to iPhones to reference monitors within an Emergency room setting and found the Apps

139 provided inaccurate measurements with a sensitivity for detection SpO<sub>2</sub> <94% on the reference  
140 monitor ranging from 0-69%.<sup>20</sup> Two of these Apps utilized the onboard light and camera lens (Pox  
141 and Ox) and one used an external device that plugged into the iPhone. Alexander et al.,<sup>21</sup> evaluated  
142 two other smartphone Apps (Pulse Oximeter and Pulse Oximeter Pro) again downloaded onto an  
143 iPhone and using onboard light and camera lens to perform SpO<sub>2</sub> measurements, predominantly in a  
144 Pre-operative setting. Comparison of these Apps with clinical devices utilized by the Dept of  
145 Anesthesia showed similar mean and median values, but wide and highly significant variance in  
146 measurements.<sup>21</sup> Tayfur et al., compared SpO<sub>2</sub> measurements obtained on 101 hospitalized patients  
147 (43% having pulmonary disease) using Samsung Galaxy S8 with that measured by simultaneous  
148 ABGs and reported measurements as highly correlated and having a small bias with narrow levels  
149 of agreement.<sup>22</sup> Modi et al. conducted 6 minute walk pre- and post- oximetry testing to perform a  
150 comparison of a Massimo-radical7 device, a clip Kenek sensor connected to an iPhone, and a  
151 Samsung Galaxy 8.<sup>23</sup> They reported a correlation between SpO<sub>2</sub> measurements (  $r= 0.62 - 0.72$ ,  
152  $p<0.001$ ) and provided values from 28 out of 47 participants on a Bland Altman analysis that used  
153 an average of the SpO<sub>2</sub> obtained by the FDA approved Massimo-radical7 reference device and the  
154 smartphone readings as ‘true’ SpO<sub>2</sub>, making this data difficult to evaluate. Most recently, Browne et  
155 al reported findings from clinical studies on 320 participants that utilized a repeated measure, nested  
156 factorial design to evaluate the accuracy and precision of a smartphone model, containing Maxim  
157 Integrated biosensors and App in comparison to Welch Allyn reference units.<sup>24</sup> Their results  
158 indicated a wide range of adult persons utilized a smartphone model to perform repeated pulse  
159 oximeter spot checks with an accuracy and precision equivalent to hospital grade clip sensors.<sup>24</sup>  
160 This clinical study had few hypoxemic patients, but did report human steady state hypoxia testing of

161 the smartphone model versus a portable reference device that indicated FDA/ISO requirements  
162 were likely to be met if full testing was conducted.<sup>24</sup>

163 These widely varying findings are associated with studies that did not follow uniform protocols,  
164 were in different patient populations and none performed as we did full FDA/ISO required human  
165 hypoxia testing using ABGs as the oxygen saturation reference. Aside from these limitations, the  
166 major determinant of accuracy differences observed across these studies likely reflects differences  
167 in the quality of the underlying hardware and proprietary algorithms within the smartphone tested.  
168 Whilst traditional pulse oximeters in hospital settings rely on the transmission of light through  
169 cutaneous tissues such as the finger or ear lobe, smartphones systems utilize reflected light detected  
170 by a sensor on the same surface as the emitter.<sup>25</sup> Within such systems how the reflected light signal  
171 is obtained and analyzed is critical. Poorly performing pulse oximetry Apps used the onboard light  
172 and camera lens to obtain reflected light to detect PPG signals and conformational changes  
173 associated with hemoglobin binding. Signal obtained from camera associated sensors have  
174 relatively high signal to noise ratios and may even block near infrared light.<sup>25</sup> In contrast, the  
175 smartphone evaluated in our study has dedicated hardware specifically for pulse oximetry function  
176 (see Figure 1) with 660nm red and 910nm infrared LEDs used to take measurements, a  
177 photodetector connected to an extremely low noise analog channel allowing measurement on a  
178 broad range of skin colors, and placement entirely separate from other phone devices such as the  
179 camera. Studies testing similar hardware and algorithms reported high SpO<sub>2</sub> measurement  
180 accuracy.<sup>24,22</sup> All future studies evaluating smartphone oximetry accuracy should specify the type  
181 of embedded hardware including biosensor manufacturer, App proprietor and site of placement  
182 within the smartphone, as these features constitute the actual oximetry device



183 *Implications for Clinical Assessment:* Our introduction described the widespread health system  
184 guidance on the use of at home SpO<sub>2</sub> measurement to grade the severity of COVID-19 infection.  
185 Currently, infection numbers are increasing rapidly in association with the presence of the UK  
186 variant in multiple regions globally, resulting in greater demand for effective, inexpensive at home  
187 monitoring to identify patient deterioration<sup>26,27</sup>. Media reports indicate consumer purchase of  
188 oximeters has increased considerably since the start of the current pandemic.<sup>25</sup> The foremost  
189 concern of experts regarding home pulse oximetry during the current pandemic is the accuracy of  
190 SpO<sub>2</sub> measurements, particularly as saturation falls below 90%.<sup>25</sup> Data on the accuracy of  
191 inexpensive stand-alone oximeters is limited, as there has been little regulatory oversight.<sup>13,25</sup> The  
192 best study available on the accuracy of inexpensive finger oximeters reported wide variability, with  
193 the majority of devices tested demonstrating highly inaccurate readings during hypoxia.<sup>13</sup>  
194 Consumers are essentially unaware of these differences and healthcare workers only find reliable  
195 accuracy information for more expensive devices (>\$150) on the market.<sup>25</sup> As the current cost of  
196 FDA cleared pulse oximeters varies from hundreds to greater than a thousand USD, it is highly  
197 likely the majority of at home pulse oximeters in use are not FDA/ISO cleared. In this regard our  
198 findings indicate that pulse oximetry measurements obtained by the Samsung Galaxy S9/9+ meet  
199 prescribed standards for clinical use and are more accurate than stand-alone oximeters for which no  
200 reliable information is available.  
201  
202 Pulmonologist practical guidance during COVID-19 at home monitoring states oximetry devices  
203 should provide some indication of pulse signal strength and that measurements should be taken and  
204 recorded two to three times a day at rest.<sup>25</sup> Using any oximeter, the finger must be positioned  
205 accurately relative to the sensor. The Samsung Healthcare App does provide assessment of adequate

206 finger placement and adequate pulse strength and does not take a reading unless both are  
207 appropriate. This feature is important as accurately positioning the finger over the sensor on the  
208 back of the phone, then turning the hand to view the reading on the front, is more difficult than  
209 using a finger clip sensor. The oximetry function on Samsung S9/9+ smartphones is designed for  
210 spot check only, where the user holds their finger in place for approximately 30 seconds and gets a  
211 single reading. While multiple spot checks during the day can be made, the manner in which these  
212 readings are displayed under a label of ‘stress test’ within the Samsung Health App may be  
213 confusing to patients. However, the App does contain a ‘share’ function which enables approved  
214 providers to receive daily SpO<sub>2</sub> and HR data that can be used to support at home assessment; and  
215 historical data is stored. Collaboration between software developers and smartphone manufacturers  
216 could easily improve this design to include instruction to take 2-3 readings a day at rest and warm  
217 extremities before measurement, in line with recommendations<sup>25</sup>, as well as present graphical data  
218 trends over time for transmission to healthcare practitioners.

219  
220 *Study Limitations:* This study used healthy volunteers under steady state hypoxia testing (SpO<sub>2</sub>  
221 approximately 70-100%) and thus provides no data on accuracy below 70%. Data from healthy  
222 volunteers provides no information on accuracy of SpO<sub>2</sub> measurement under conditions of reduced  
223 extremity pulsatile blood flow, associated with vasoconstriction due to Raynauds, hypotension or  
224 peripheral vascular disease, the latter is common in persons with diabetes and coronary heart  
225 disease, both risk factors for severe Covid-19 infection<sup>28</sup>. Furthermore, measurement accuracy in  
226 the presence of diseases associated with hemoglobinopathies, such as sickle cell or thalassemia, or  
227 where elevated carboxyhemoglobin (potentially present in heavy smokers) or methemoglobin  
228 (associated with use of chloroquine, sulfonamides) may occur, is unknown. This study does not

229 provide any evidence on the use of this system in children. Finally, the system tested is designed to  
230 provide SpO<sub>2</sub> spot checks only, there is no evidence from our study to support use for continuous  
231 pulse oximetry.

232  
233 **Conclusion:** Based on our findings and the substantial need for widespread global access to  
234 accurate pulse oximetry during the current pandemic we recommend the high-grade biosensors and  
235 Samsung proprietary algorithm embedded in S9 and S10 smartphones pursue FDA 510K clearance  
236 and ISO certification for use to obtain spot SpO<sub>2</sub> measurements for clinical use. Review could be  
237 prioritized and fast tracked by the FDA/ ISO organizations under the ‘Emergency Use  
238 Authorizations’ for ‘Remote or Wearable Patient Monitoring Devices associated with the Covid-19  
239 pandemic’.<sup>30</sup> This may substantially support global efforts to respond to the current Covid-19,  
240 particularly in LMIC settings, where access to accurate spot pulse oximetry is limited<sup>11</sup>.

241  
242 **Acknowledgements:** Funding was provided by NIH grant supplement R01MH110057-04S to SHB  
243 and by the non-profit, Specialists in Global Health (<https://sigh.global/>). We thank Samsung  
244 Electronics, Suwon-si, Korea, for critical appraisal of this manuscript.

245  
246 **References**  
247 1. Richardson S, Hirsch JS, Narasimhan M, et al. Presenting characteristics, comorbidities, and  
248 Outcomes among 5700 Patients Hospitalized with COVID-19 in the New York City Area.  
249 *JAMA*. 2020;323:2052-2059. doi:10.1001/jama.2020.6775  
250 2. Gandhi RT, Lynch JB, del Rio C. Mild or Moderate Covid-19. Solomon CG, ed. *New*  
251 *England Journal of Medicine*. April 2020. doi:10.1056/nejmcp2009249

- 252 3. Berlin DA, Gulick RM, Martinez FJ. Severe Covid-19. Solomon CG, ed. *New England*  
253 *Journal of Medicine*. May 2020. doi:10.1056/nejmcp2009575
- 254 4. Nicola, M., O'Neill, N., Sohrabi, C., & Khan, M. (2020). Evidence Based Management  
255 Guideline for the COVID-19 Pandemic - Review article. *International Journal of Surgery*  
256 *(London, England)*. doi:10.1016/j.ijssu.2020.04.001
- 257 5. The latest global coronavirus statistics, charts and maps. (n.d.). Retrieved from  
258 [graphics.reuters.com website: https://graphics.reuters.com/world-coronavirus-tracker-and-](https://graphics.reuters.com/world-coronavirus-tracker-and-maps/)  
259 [maps/](https://graphics.reuters.com/world-coronavirus-tracker-and-maps/)
- 260 6. Sala, H., Roca, J. S., Zerbo, G., Garcia, R., Cabral, G., Fernandez, A., . . . Rizzo, O. (2011).  
261 Initial Clinical Management of Symptomatic Adult Patients during Influenza A (H1N1)  
262 Epidemics. *The Journal of Emergency Medicine*, 41(4), 435-440.  
263 doi:10.1016/j.jemermed.2010.05.093
- 264 7. Verhoeven, D., Teijaro, J. R., & Farber, D. L. (2009). Pulse-oximetry accurately predicts  
265 lung pathology and the immune response during influenza infection. *Virology*, 390(2), 151-  
266 156. doi:10.1016/j.virol.2009.05.004
- 267 8. Coronavirus: Pulse oximetry to detect early deterioration of patients with COVID-19 in  
268 primary and community care settings. (2020). Retrieved from  
269 [https://www.england.nhs.uk/coronavirus/publication/pulse-oximetry-to-detect-early-](https://www.england.nhs.uk/coronavirus/publication/pulse-oximetry-to-detect-early-deterioration-of-patients-with-covid-19-in-primary-and-community-care-settings/)  
270 [deterioration-of-patients-with-covid-19-in-primary-and-community-care-settings/](https://www.england.nhs.uk/coronavirus/publication/pulse-oximetry-to-detect-early-deterioration-of-patients-with-covid-19-in-primary-and-community-care-settings/)
- 271 9. NHS England. (2020). *Annex 2: Remote Monitoring COVID-19 Diary*. Retrieved from NHS  
272 England website: [https://www.arstubi.driba.lv/wp-content/uploads/2020/11/NHS-COVID-](https://www.arstubi.driba.lv/wp-content/uploads/2020/11/NHS-COVID-19_oksimeters.pdf)  
273 [19\\_oksimeters.pdf](https://www.arstubi.driba.lv/wp-content/uploads/2020/11/NHS-COVID-19_oksimeters.pdf)

- 274 10. Fuglebjerg, N. J. U., Jensen, T. O., Hoyer, N., Rysør, C. K., Lindegaard, B., & Harboe, Z. B.  
275 (2020). Silent hypoxia in patients with SARS CoV-2 infection before hospital discharge.  
276 *International Journal of Infectious Diseases*, 99, 100-101. doi:10.1016/j.ijid.2020.07.014
- 277 11. Bickler, P. E., Feiner, J. R., Lipnick, M. S., & Mckleroy, W. (2020). “Silent” Presentation of  
278 Hypoxemia and Cardiorespiratory Compensation in COVID-19. *Anesthesiology*.  
279 doi:10.1097/aln.0000000000003578
- 280 12. WHO. (2008). *Global Pulse Oximetry Project Background Document*. Retrieved from  
281 [https://www.who.int/patientsafety/events/08/1st\\_pulse\\_oximetry\\_meeting\\_background\\_doc.](https://www.who.int/patientsafety/events/08/1st_pulse_oximetry_meeting_background_doc.pdf)  
282 [pdf](https://www.who.int/patientsafety/events/08/1st_pulse_oximetry_meeting_background_doc.pdf)
- 283 13. Lipnick, M. S., Feiner, J. R., Au, P., Bernstein, M., & Bickler, P. E. (2016). The Accuracy of  
284 6 Inexpensive Pulse Oximeters Not Cleared by the Food and Drug Administration.  
285 *Anesthesia & Analgesia*, 123(2), 338-345. doi:10.1213/ane.0000000000001300
- 286 14. Personal Communication Samsung Electronics, Suwon-si, Korea.
- 287 15. O'Dea, S. (2020). Samsung Galaxy S series shipments worldwide 2016-2018. Retrieved  
288 from [https://www.statista.com/statistics/864691/samsung-galaxy-s-series-smartphone-](https://www.statista.com/statistics/864691/samsung-galaxy-s-series-smartphone-shipments-worldwide/)  
289 [shipments-worldwide/](https://www.statista.com/statistics/864691/samsung-galaxy-s-series-smartphone-shipments-worldwide/)
- 290 16. Severinghaus, J. W., Naifeh, K. H., & Koh, S. O. (1989). Errors in 14 pulse oximeters  
291 during profound hypoxia. *Journal of Clinical Monitoring*, 5(2), 72-81.  
292 doi:<https://doi.org/10.1007/bf01617877>
- 293 17. Severinghaus, J. W. (2009). Gadgeteering for Health Care. *Anesthesiology*, 110(4), 721-  
294 728.

- 295 18. Bland, J. M., & Altman, D. G. (2007). Agreement Between Methods of Measurement with  
296 Multiple Observations Per Individual. *Journal of Biopharmaceutical Statistics*, 17(4), 571-  
297 582. doi:10.1080/10543400701329422
- 298 19. Canalys Newsroom- Global smartphone market Q4 and full year 2019. (2019). Retrieved  
299 from Canalys.com website: [https://www.canalys.com/newsroom/canalys-global-](https://www.canalys.com/newsroom/canalys-global-smartphone-market-q4-2019)  
300 [smartphone-market-q4-2019](https://www.canalys.com/newsroom/canalys-global-smartphone-market-q4-2019)
- 301 20. Jordan, T. B., Meyers, C. L., & Schradling, W. A. (2020). The utility of iPhone oximetry  
302 apps: A comparison with standard pulse oximetry measurement in the emergency  
303 department. *American Journal of Emergency Medicine*, 38(5), 925-928.  
304 doi:10.1016/j.ajem.2019.07.020
- 305 21. Alexander, J. C., Minhajuddin, A., & Joshi, G. P. (2017). Comparison of smartphone  
306 application-based vital sign monitors without external hardware versus those used in clinical  
307 practice: a prospective trial. *Journal of Clinical Monitoring*, 825-831. doi:10.1007/s10877-  
308 016-9889-6
- 309 22. Tayfur, I., & Afacan, M. A. (2019). Reliability of smartphone measurements of vital  
310 parameters: A prospective study using a reference method. *American Journal of Emergency*  
311 *Medicine*, 37(8), 1527-1530. doi:10.1016/j.ajem.2019.03.021
- 312 23. Modi, A. M., Kiourkas, R., Li, J., & Scott, J. B. (2020). Reliability of Smartphone Pulse  
313 Oximetry in Subjects at Risk for Hypoxemia. *Respiratory Care*, respcare.07670.  
314 doi:10.4187/respcare.07670
- 315 24. Browne, S. H., Bernstein, M., Pan, S. C., Garcia, J. G., Easson, C. A., Huang, C. C., . . .  
316 Vaida, F. (2020). Maxim Integrated Smartphone Sensor with App Meets FDA/ISO

- 317 Standards for Clinical Pulse Oximetry and can be Reliably Utilized by a Wide Range of  
318 Patients. *Chest*. doi:10.1016/j.chest.2020.08.2104
- 319 25. Luks, A. M., & Swenson, E. R. (2020). Pulse Oximetry for Monitoring Patients with  
320 COVID-19 at Home. Potential Pitfalls and Practical Guidance. *Annals of the American Thoracic Society*, 17(9), 1040-1046. doi:10.1513/AnnalsATS.202005-418FR  
321
- 322 26. Mahase, E. (2020). Covid-19: What have we learnt about the new variant in the  
323 UK? *BMJ*, 371. <https://doi.org/10.1136/bmj.m4944>
- 324 27. Wise, J. (2020). Covid-19: New coronavirus variant is identified in UK. *BMJ*, 371.  
325 <https://doi.org/10.1136/bmj.m4857>
- 326 28. Daily, L. (2020). What is a pulse oximeter, and does the coronavirus pandemic mean you  
327 need one? Retrieved from [https://www.washingtonpost.com/lifestyle/wellness/pulse-](https://www.washingtonpost.com/lifestyle/wellness/pulse-oximeter-covid-19-coronavirus/2020/05/18/5b6f8a98-96df-11ea-9f5e-56d8239bf9ad_story.html)  
328 [oximeter-covid-19-coronavirus/2020/05/18/5b6f8a98-96df-11ea-9f5e-](https://www.washingtonpost.com/lifestyle/wellness/pulse-oximeter-covid-19-coronavirus/2020/05/18/5b6f8a98-96df-11ea-9f5e-56d8239bf9ad_story.html)  
329 [56d8239bf9ad\\_story.html](https://www.washingtonpost.com/lifestyle/wellness/pulse-oximeter-covid-19-coronavirus/2020/05/18/5b6f8a98-96df-11ea-9f5e-56d8239bf9ad_story.html)
- 330 29. Du Y, Tu L, Zhu P, et al. Clinical Features of 85 Fatal Cases of COVID-19 from Wuhan: A  
331 Retrospective Observational Study. *Am J Respir Crit Care Med*. 2020;201(11):1372-1379.  
332 doi:10.1164/rccm.202003-0543OC
- 333 30. Center for Devices and Health. (2020). Coronavirus Disease 2019 (COVID-19) Emergency  
334 Use Authorizations for Medical Devices. Retrieved from [https://www.fda.gov/medical-](https://www.fda.gov/medical-devices/emergency-use-authorizations-medical-devices/coronavirus-disease-2019-covid-19-emergency-use-authorizations-medical-devices)  
335 [devices/emergency-use-authorizations-medical-devices/coronavirus-disease-2019-covid-19-](https://www.fda.gov/medical-devices/emergency-use-authorizations-medical-devices/coronavirus-disease-2019-covid-19-emergency-use-authorizations-medical-devices)  
336 [emergency-use-authorizations-medical-devices](https://www.fda.gov/medical-devices/emergency-use-authorizations-medical-devices/coronavirus-disease-2019-covid-19-emergency-use-authorizations-medical-devices)  
337  
338  
339

## FIGURES: SMARTPHONE INTEGRATED PULSE OXIMETER

Figure 1: (A) shows the location of the SpO<sub>2</sub> sensor on the back of the smartphone making clear that the sensor is entirely separate from the other phone devices such as the camera. In the expanded view (B) the dedicated photo sensor and LEDs for the pulse oximetry function are shown. The device has a total of 4 LEDs two of which are reserved for future additional functionality. The arrow indicates the 660 nM red and 910nM infrared LEDs used in this measurement. The photodetector is connected to an extremely low noise analog channel allowing measurement on a broad range of skin colors.

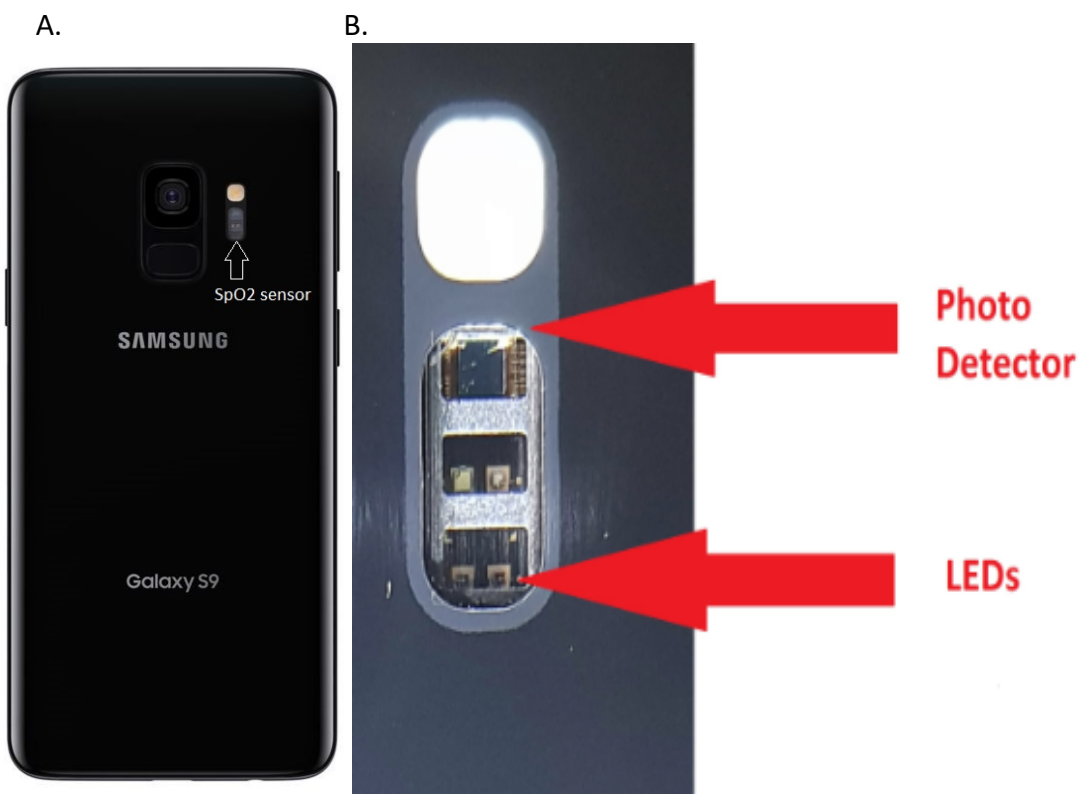



Figure 2: Plastic phone case with silicon boot attached used to hold each participant's finger in position continuously for over 30 minutes.

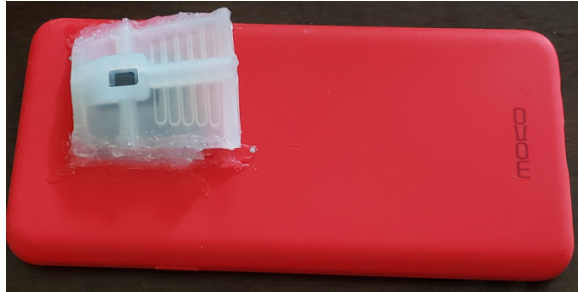

Figure 3: Plot of data collected from 12 human volunteers during this test of the bias in blood oxygen measurements. Each point on the plot represents paired blood oxygen levels recorded by the hemoximeter associated with the Samsung Phone reading. The upper and lower limits of agreement per Bland Altman 2007<sup>17</sup> are shown in red and blue lines respectively.

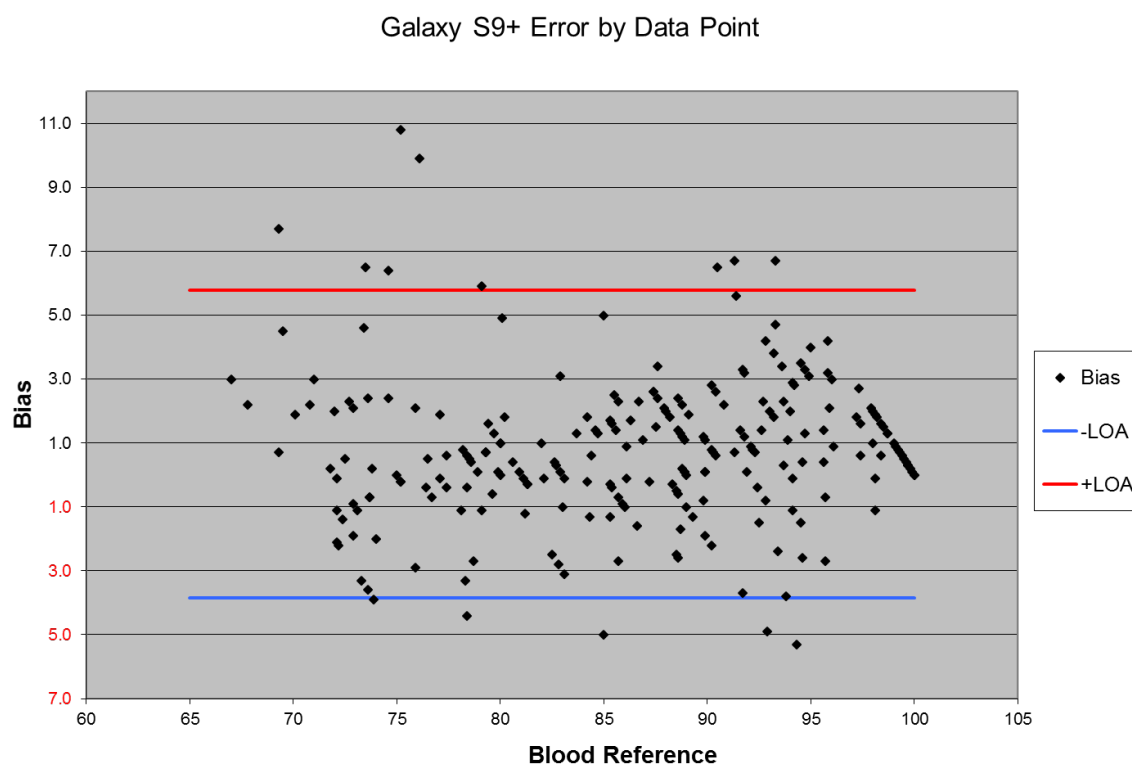

Source: https://medrxiv.org/content/10.1101/2021.02.17.21249755v1.full.pdf
